# Supplementary material for: Whole genome sequencing for the molecular characterization of carbapenem-resistant Klebsiella pneumoniae strains isolated at the Italian ASST Fatebenefratelli Sacco Hospital, 2012–2014
Source: Springer Nature journal article supplement (doi:10.1186/s12879-017-2760-7), 2017-10-10
Supplement: MOESM2 [file 15124036]

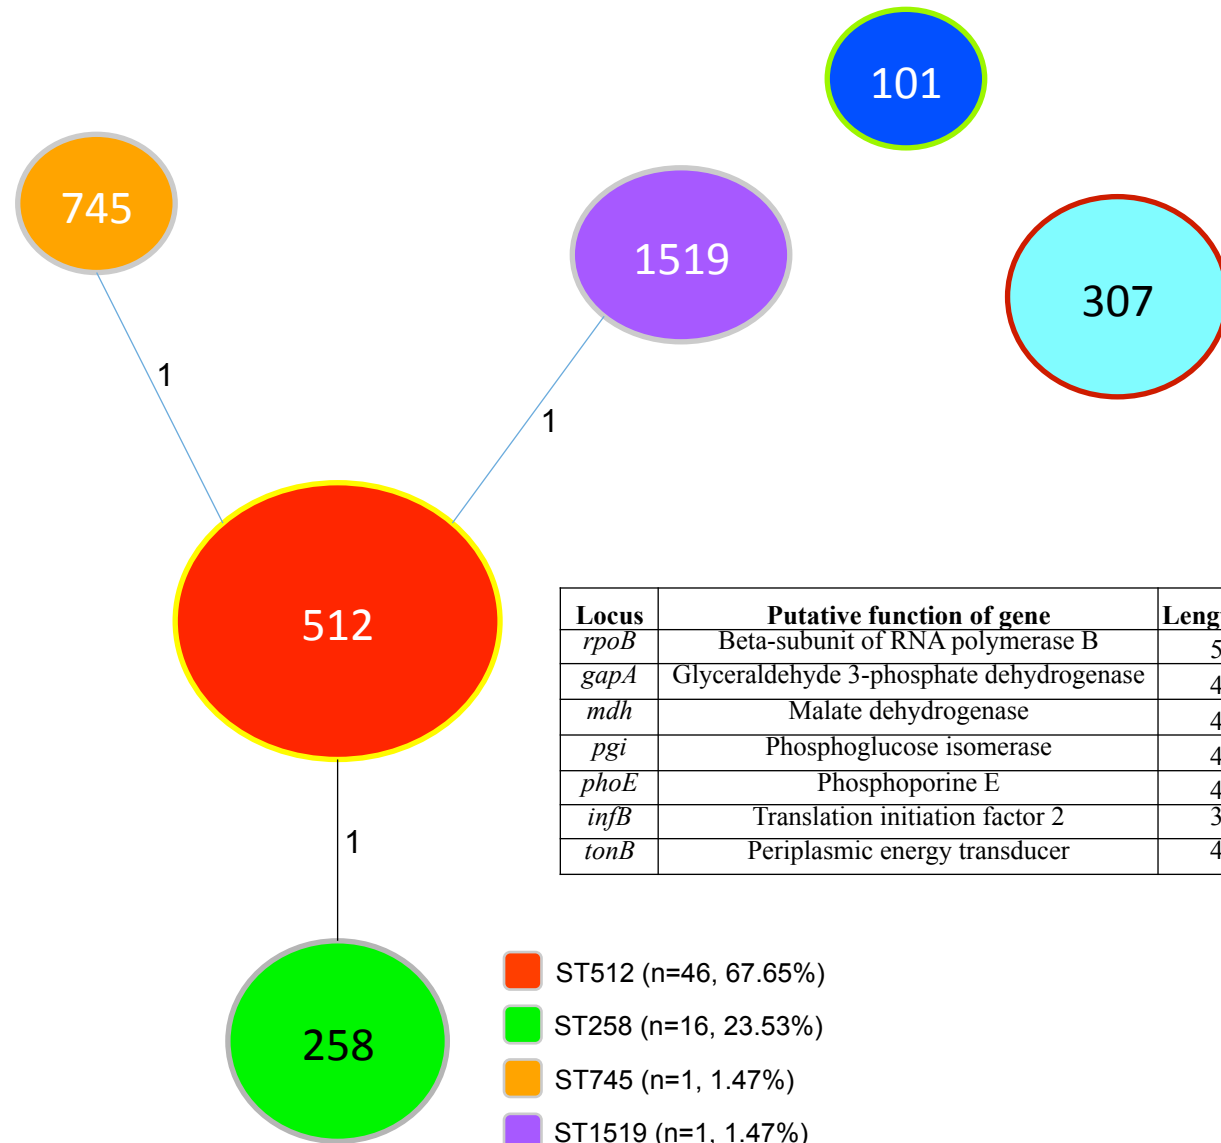

| Locus       | Putative function of gene                | Length (bp) | CC258 |       |       |        | ST101 | ST307 |
|-------------|------------------------------------------|-------------|-------|-------|-------|--------|-------|-------|
|             |                                          |             | ST258 | ST512 | ST745 | ST1519 |       |       |
| <i>rpoB</i> | Beta-subunit of RNA polymerase B         | 501         | 1     | 1     | 67    | 9      | 1     | 1     |
| <i>gapA</i> | Glyceraldehyde 3-phosphate dehydrogenase | 450         | 3     | 54    | 54    | 54     | 2     | 4     |
| <i>mdh</i>  | Malate dehydrogenase                     | 477         | 1     | 1     | 1     | 1      | 1     | 2     |
| <i>pgi</i>  | Phosphoglucose isomerase                 | 432         | 1     | 1     | 1     | 1      | 5     | 52    |
| <i>phoE</i> | Phosphoporine E                          | 420         | 1     | 1     | 1     | 1      | 4     | 1     |
| <i>infB</i> | Translation initiation factor 2          | 318         | 3     | 3     | 3     | 3      | 6     | 1     |
| <i>tonB</i> | Periplasmic energy transducer            | 414         | 79    | 79    | 79    | 79     | 6     | 7     |

- ST512 (n=46, 67.65%)
- ST258 (n=16, 23.53%)
- ST745 (n=1, 1.47%)
- ST1519 (n=1, 1.47%)
- ST307 (n=3, 4.41%)
- ST101 (n=1, 1.47%)
